# Supplementary material for: Shifting from Ammonium to Phosphonium Salts: A Promising Strategy to Develop Next-Generation Weapons against Biofilms
Source: MDPI journal article supplement (doi:10.3390/pharmaceutics16010080), 2024-01-05
Supplement: s1 [file s1]

## Supplementary Materials

**Table S1.** Clinically relevant MDR pathogens with the associated infections [7].

| <b>Bacteria</b>                           | <b>No longer functioning Drugs</b>                                                                                  | <b>Infections</b>                                         | <b>Ref.</b> |
|-------------------------------------------|---------------------------------------------------------------------------------------------------------------------|-----------------------------------------------------------|-------------|
| <i>P. aeruginosa</i>                      | Aminoglycosides, quinolones<br>$\beta$ -lactams, carbapenems                                                        | Cystic Fibrosis<br>COPD                                   | [8]         |
| <i>Enterococcus</i> spp                   | $\beta$ -lactams, aminoglycoside<br>Tetracycline, erythromycin<br>Vancomycin, streptomycin<br>Linezolid, quinolones | Endocarditis, UTI, BSI, IAA,<br>IPA                       | [9,10]      |
| <i>A. baumannii</i>                       | $\beta$ -lactams, tetracyclines<br>Quinolones, polymixins<br>Aminoglycosides<br>Lincosamides<br>Carbapenems         | HAP, VAP, UTI<br>Meningitis<br>Bacteraemia, GIT<br>SI, WI | [11]        |
| <i>E. coli</i>                            | Cephalosporins, fluoroquinolones<br>Levofloxacin, TSX                                                               | UTI, BSI                                                  | [12]        |
| <i>K. pneumoniae</i>                      | Cephalosporins, carbapenems                                                                                         | Pneumonia, BSI, UTI                                       | [13]        |
| <i>S. aureus</i>                          | Methicillin                                                                                                         | WI, BSI                                                   | [14]        |
| <i>Streptococcus pneumoniae</i>           | Penicillin                                                                                                          | Pneumonia, meningitis<br>otitis                           | [15]        |
| <i>Nontyphoidal Salmonella</i>            | Fluoroquinolones                                                                                                    | Foodborne diarrhea, BSI                                   | [16]        |
| <i>Shigella</i> spp                       | Fluoroquinolones, ampicillin, TSX<br>Nalidixic acid                                                                 | Diarrhea *                                                | [17]        |
| <i>Neisseria gonorrhoeae</i>              | Cephalosporins, tetracyclines<br>Macrolides, TSX, quinolones.                                                       | Gonorrhea                                                 | [18]        |
| <i>Mycobacterium tuberculosis</i>         | Rifampicin, isoniazid, fluoroquinolone                                                                              | Tuberculosis                                              | [19]        |
| <b>Fungi</b>                              |                                                                                                                     |                                                           |             |
| <i>Candida</i> spp                        | Fluconazole, echinocandins                                                                                          | Candidiasis                                               | [20]        |
| <i>Cryptococcus neoformans</i>            | Fluconazole                                                                                                         | Cryptococcosis                                            | [21]        |
| <i>Aspergillus</i> spp                    | Azoles                                                                                                              | Aspergillosis                                             | [22]        |
| <i>Scopulariopsis</i> spp                 | Amphotericin B, flucytosine, azoles                                                                                 | Onychomycosis                                             | [23]        |
| <b>Virus</b>                              |                                                                                                                     |                                                           |             |
| <i>Cytomegalovirus</i> (CMV)              | Ganciclovir, foscarnet                                                                                              | AIDS and oncology patients                                | [24]        |
| <i>Herpes simplex virus</i> (HSV)         | Acyclovir, famciclovir, valacyclovir                                                                                | Herpes simplex                                            | [25]        |
| <i>Human immunodeficiency virus</i> (HIV) | Antiretroviral drugs                                                                                                | AIDS                                                      | [26]        |
| <i>Influenza virus</i>                    | Amantadine, rimantadine<br>Neuraminidase inhibitors                                                                 | Influenza                                                 | [27]        |
| <i>Varicella zoster virus</i>             | Acyclovir, valacyclovir                                                                                             | Chicken pox                                               | [25]        |

|                                |                                                                     |                 |         |
|--------------------------------|---------------------------------------------------------------------|-----------------|---------|
| <i>Hepatitis B virus (HBV)</i> | Lamivudine                                                          | Hepatitis B     | [28]    |
| <b>Parasite</b>                |                                                                     |                 |         |
| <i>Plasmodia spp</i>           | Chloroquine, artemisinin, atovaquone                                | Malaria         | [29]    |
| <i>Leishmania spp</i>          | Pentavalent antimonials, miltefosine<br>Paromomycin, amphotericin B | Leishmaniasis   | [30,31] |
| <i>Schistosomes</i>            | Praziquantel, oxamniquine                                           | Schistosomiasis | [32,33] |
| <i>Entamoeba</i>               | Metronidazole                                                       | Amoebiasis      | [34]    |
| <i>Trichomonas vaginalis</i>   | Nitroimidazoles                                                     | Trichomoniasis  | [35]    |
| <i>Toxoplasma gondii</i>       | Artemisinin, atovaquone, sulfadiazine                               | Toxoplasmosis   | [36-38] |

\* Bacillary dysentery; TSX = Trimethoprim-sulfamethoxazole; UTI = urinary tract infection; BSI = bloodstream infection; COPD = chronic obstructive pulmonary disease (COPD); IAA = intra-abdominal abscesses; IPA = intra-pelvic abscesses; HAP = hospital acquired pneumonia; VAP = ventilator-associated pneumonia; GIT = gastrointestinal infections; SI = skin infections; WI = wound infections. The references in the Table are available at the end of the main text at the correspondent numbers.

**Table S2.** General composition of BFs.

| Biofilm Biomass                                                                                                         |                                                                                        |                                                                                                  |
|-------------------------------------------------------------------------------------------------------------------------|----------------------------------------------------------------------------------------|--------------------------------------------------------------------------------------------------|
| Organized communities of pathogens’ cells (2-5%)                                                                        |                                                                                        | Extracellular polymeric substances (EPSs)                                                        |
| Sessile cells                                                                                                           | Persistent cells                                                                       | Enzymes                                                                                          |
|                                                                                                                         | Dormant cell                                                                           | (polypeptides, 1-60%)                                                                            |
| Self-immobilized cells attached to a surface, forming highly coordinated micro-colonies, communicating by the QS system | Small subpopulation of microorganisms reversibly transformed into slowly growing cells | Polysaccharides (40-95%)<br>(Cellulose, PGA, exopolysaccharide)                                  |
|                                                                                                                         |                                                                                        | Extracellular DNA and RNA (eDNA, eRNA) (1-10%)                                                   |
|                                                                                                                         |                                                                                        | Glycoproteins                                                                                    |
|                                                                                                                         |                                                                                        | Glycolipids (1-40%)<br>Allow communication between bacteria<br>Stabilize the 3-D structure of BF |
|                                                                                                                         |                                                                                        | Water (70-97%)<br>(responsible for the flow of nutrients)                                        |

PGA = poly-glucosamine.

**Table S3.** Stages of the BF life cycle.

| Stage | Action                                                   | Events                                                                                                                                                                                             | Ref. |
|-------|----------------------------------------------------------|----------------------------------------------------------------------------------------------------------------------------------------------------------------------------------------------------|------|
| 1     | Reversible attachment                                    | Free-floating planktonic cells select a surface for attachment and self-immobilize on it<br>The attachment is not permanent<br>The locomotory tools such as flagella and pili are still maintained |      |
| 2     | Irreversible attachment                                  | Expression of QS signaling molecules<br>Formation of extracellular polymeric material<br>↓ in flagella reversal rates<br>↓ in flagella gene expression<br>Cells demonstrate drug tolerance         |      |
| 3     | Grow and cells division (Maturation I)                   | Recruitment of cells from the environment<br>Appearance of cell clusters *<br>Formation of micro-colonies                                                                                          | [73] |
| 4     | Formation of the 3D-structured mature BF (Maturation II) | Expression of genes needed for the mature (3D) extracellular matrix<br>Water-filled channels formation for transport of nutrients and removing waste materials                                     |      |
| 5     | BF dispersion **                                         | ↓ and degradation of matrix components<br>Detachment of planktonic cells<br>Multiplication and dispersal of motile cells<br>↑ Drug susceptibility ***                                              |      |

\* Several cells thick embedded in the BF matrix; \*\* promoted by QS or enzyme action; \*\*\* sometime antibiotic insensitivity can be retained; ↓ = decrease, reduction; ↑ = increase. The reference in the Table is available at the end of the main text at the correspondent number.

**Disclaimer/Publisher's Note:** The statements, opinions and data contained in all publications are solely those of the individual author(s) and contributor(s) and not of MDPI and/or the editor(s). MDPI and/or the editor(s) disclaim responsibility for any injury to people or property resulting from any ideas, methods, instructions or products referred to in the content.
